# Supplementary material
Source: MDPI journal article supplement (https://www.mdpi.com/1424-2818/10/3/53)
Supplement: s1 [file s1]

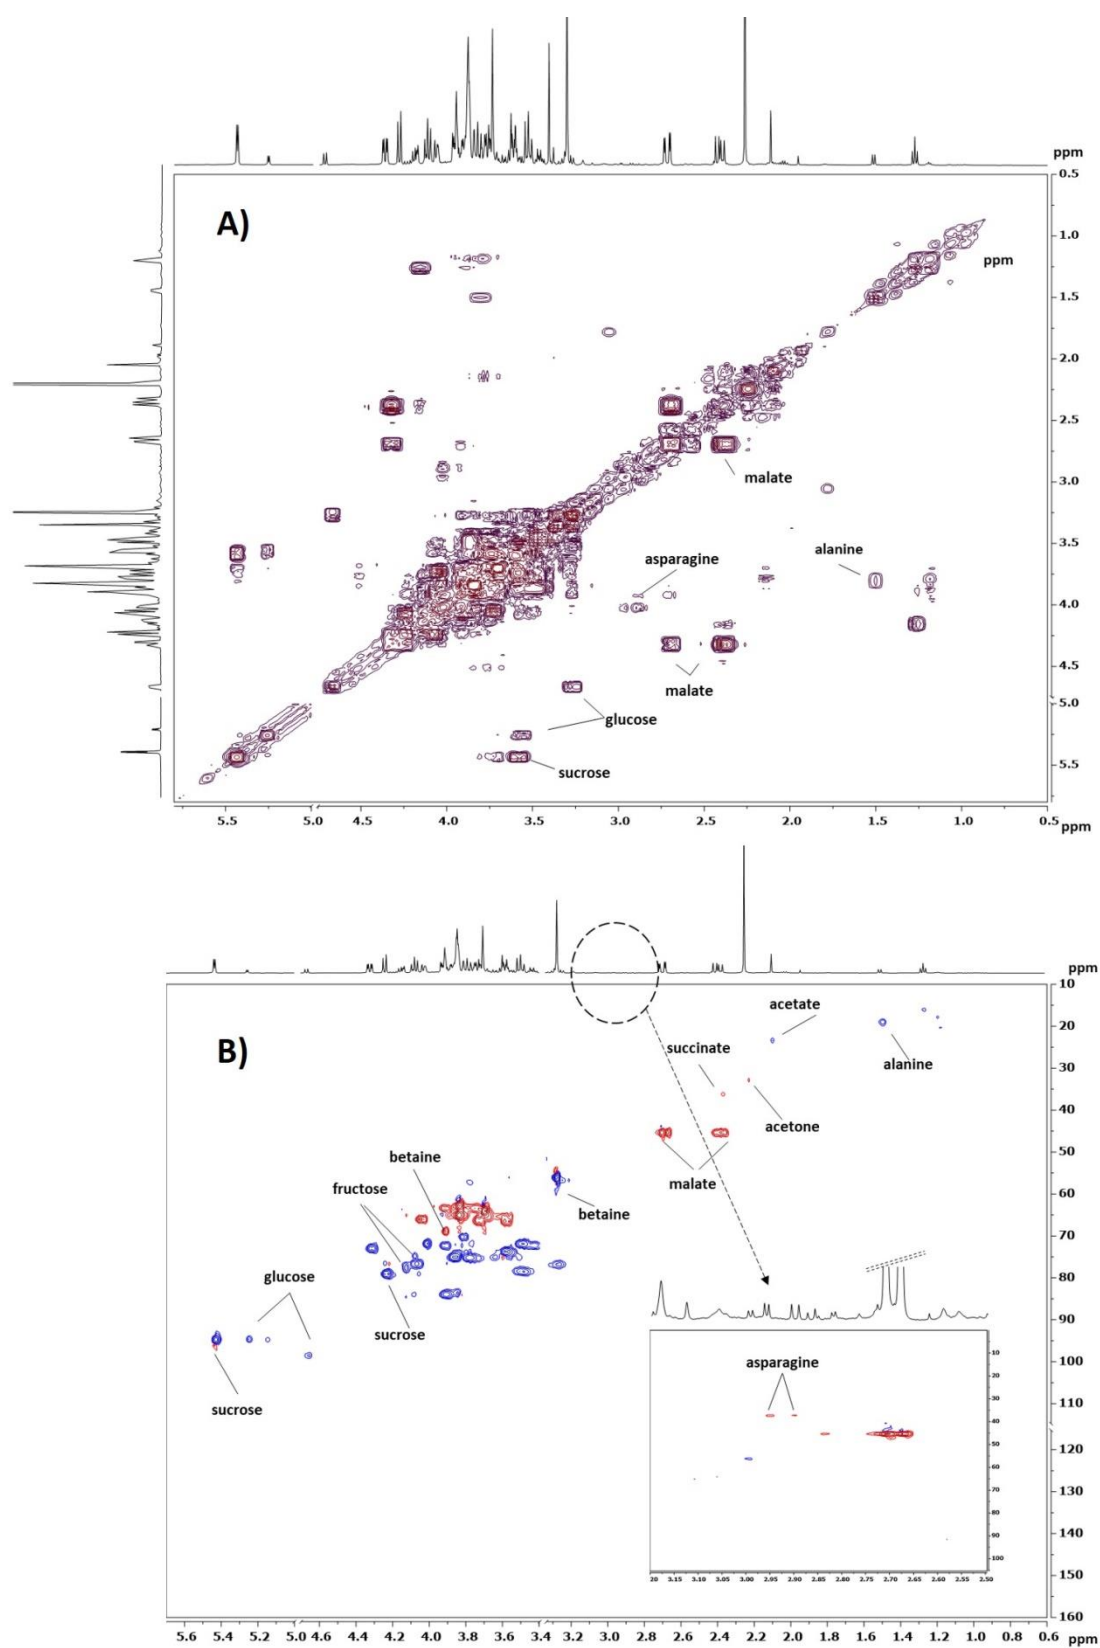

**Figure S1.** Representative (A) COSY and (B) HSQC spectra of the aqueous extracts of *C. coccineum* from Sardinia
